1 **Acceptability of decentralizing childhood tuberculosis diagnosis in low-income**  
2 **countries with high tuberculosis incidence: experiences and perceptions from**  
3 **health care workers in sub-Saharan Africa and South-East Asia**

4  
5 Basant Joshi<sup>1\*</sup>, Yara Voss De Lima<sup>2</sup>, Douglas Mbang Massom<sup>3</sup>, Sanary Kaing<sup>4</sup>, Marie-France  
6 Banga<sup>5</sup>, Egerton Tamba Kamara<sup>6</sup>, Sheriff Sesay<sup>6</sup>, Laurence Borand<sup>4</sup>, Jean-Voisin Taguebue<sup>7</sup>,  
7 Raoul Moh<sup>5</sup>, Celso Khosa<sup>2</sup>, Guillaume Breton<sup>6</sup>, Juliet Mwanga-Amumpaire<sup>8</sup>, Maryline Bonnet<sup>9</sup>,  
8 Eric Wobudeya<sup>10</sup>, Olivier Marcy<sup>1</sup>, Joanna Orne-Gliemann<sup>1\*</sup>, on behalf of the TB-Speed  
9 Decentralization study group<sup>^</sup>

10  
11 <sup>1</sup>University of Bordeaux, National Institute for Health and Medical Research (INSERM) UMR 1219,  
12 Research Institute for Sustainable Development (IRD) EMR 271, Bordeaux Population Health  
13 Centre, Bordeaux, France

14 <sup>2</sup>Instituto Nacional de Saúde, Marracuene, Mozambique

15 <sup>3</sup>IRD, Yaoundé, Cameroon

16 <sup>4</sup>Institut Pasteur du Cambodge, Epidemiology and Public Health Unit, Phnom Penh, Cambodia

17 <sup>5</sup>Programme PAC-CI, Site de l'ANRS Abidjan, Côte d'Ivoire

18 <sup>6</sup>Solthis, Freetown, Sierra Leone

19 <sup>7</sup>Fondation Chantal Biya, Centre Mère-Enfant, Yaoundé, Cameroun

20 <sup>8</sup>Epicentre Mbarara Research Centre, Mbarara, Uganda

21 <sup>9</sup>University of Montpellier, IRD, –INSERM, TRANSVIH MI, Montpellier, France

22 <sup>10</sup>MUJHU Research Collaboration, MU-JHU Care Limited, Kampala, Uganda

23 <sup>^</sup>TB-Speed Decentralization study Group members are listed in the acknowledgments section

24

25

26 \* Corresponding authors

27 E-mail: [basant.joshi@u-bordeaux.fr](mailto:basant.joshi@u-bordeaux.fr) (BJ)

28 E-mail: [Joanna.orne-gliemann@u-bordeaux.fr](mailto:Joanna.orne-gliemann@u-bordeaux.fr) (JOG)

29

30 **Short title:** Acceptability of decentralizing childhood tuberculosis diagnosis

31 **Keywords:** Acceptability, child, tuberculosis, diagnosis, healthcare workers

32

## 33 **Abstract** (299 words / maximum 300)

### 34 **Background**

35 Decentralizing childhood tuberculosis services, including diagnosis, is now recommended by  
36 the WHO and could contribute to increasing tuberculosis detection in high burden countries.  
37 However, implementing microbiological tests and clinical evaluation could be challenging  
38 for health care workers (HCWs) in Primary Health Centers (PHCs) and even District Hospitals  
39 (DHs). We sought to assess the acceptability of decentralizing a comprehensive childhood  
40 tuberculosis diagnosis package from HCWs' perspective.

### 41 **Design/Methods**

42 We conducted implementation research nested within the TB-Speed Decentralization study.  
43 HCWs from two health districts of Cambodia, Cameroon, Côte d'Ivoire, Mozambique, Sierra  
44 Leone, and Uganda implemented systematic screening, nasopharyngeal aspirates (NPA)  
45 and stool sample collection with molecular testing, clinical evaluation and chest X-ray (CXR)  
46 interpretation. We investigated their experiences and perceptions in delivering the diagnostic  
47 package components in 2020-21 using individual semi-structured interviews. We conducted  
48 thematic analysis, supported by the Theoretical Framework of Acceptability.

### 49 **Results**

50 HCWs (n=130, 55% female, median age 36 years, 53% nurses, 72% PHC-based) perceived that  
51 systematic screening, although increasing workload, was beneficial as it improved childhood  
52 tuberculosis awareness. Most HCWs shared satisfaction and confidence in performing NPA,  
53 despite procedure duration, need to involve parents/colleagues and discomfort for children.  
54 HCWs shared positive attitudes towards stool sample-collection but were frustrated by  
55 delayed collection associated with cultural practices, transport and distance challenges.

56 Molecular testing, conducted by nurses or laboratory technicians, was perceived as  
57 providing quality results, contributing to diagnosis. Clinical evaluation and diagnosis raised  
58 self-efficacy issues and need for continuous training and clinical mentoring. HCWs valued  
59 CXR, however complained that technical and logistical problems limited access to digital  
60 reports. Referral from PHC to DH was experienced as burdensome.

## 61 **Conclusion**

62 HCWs at DH and PHC-levels perceived and experienced decentralized childhood  
63 tuberculosis diagnosis as acceptable. Implementation however could be hampered by  
64 feasibility issues, and calls for innovative referral mechanisms for patients, samples and CXR.

65

66

67 Paper (4049 words)

68

## 69 Introduction

70 Childhood tuberculosis is a major global public health problem. Of an estimated 1.2 million  
71 children with tuberculosis in 2021, only around 58% were notified to the World Health  
72 Organization (WHO) [1]. This reporting gap is largely due to massive under-diagnosis that fuels  
73 high mortality in children [2,3]. The diagnosis of tuberculosis in children is challenging due to  
74 several individual, biomedical, and structural reasons: 1) despite being possibly severe,  
75 tuberculosis is often paucibacillary in children, hence poorly detected, even by recent  
76 molecular tests [4,5], and respiratory samples for diagnosis are challenging to collect as  
77 young children are unable to self-expectorate sputum thus require more complex sample  
78 collection methods such as gastric aspirates [6]; 2) there is no point-of-care test for childhood  
79 tuberculosis to tackle the microbiological diagnosis gap; 3) signs and symptoms used for  
80 clinical diagnosis of tuberculosis have poor sensitivity and specificity in children, and good  
81 quality chest X-ray and reliable reading is poorly accessible; 4) lastly, equipment and  
82 expertise needed for the diagnosis of childhood tuberculosis is usually lacking at lower levels  
83 of health care where most children access services [7].

84

85 WHO recently recommended decentralized models of care to deliver tuberculosis services  
86 to children and adolescents with signs and symptoms of tuberculosis [8,9]. This  
87 recommendation was based on a systematic review of studies showing that strengthening  
88 both diagnostic capacity at low levels of care, and linkage between communities and health  
89 facilities, had a positive impact on the notification of tuberculosis [10–13].

90

91 As per the definition proposed by Mills et.al, the decentralization of health services means  
92 transferring the mandate and the capacity to diagnose tuberculosis from higher to lower  
93 levels of health facilities[14]. A number of tuberculosis diagnostic tools and interventions,  
94 either already recommended by WHO or being evaluated, are currently concentrated at  
95 tertiary care levels but could be decentralized at district hospital (DH) and primary health  
96 center (PHC) levels. Nasopharyngeal aspirates and stool samples could be suitable to  
97 peripheral health care levels, as good alternatives to gastric aspirates that usually require  
98 hospitalization [15]. Portable and battery-operated molecular testing devices (using Xpert  
99 MTB-RIF Ultra) are expanding at DH-level in most countries and can be used routinely at PHC-  
100 level [8]. Access to quality chest X-Ray and interpretation, one of the challenges at PHC-level  
101 and sometimes also at DH-level, could be improved by the use of digital systems to ease the  
102 transfer of images for interpretation by trained clinicians [16,17]. As HCWs at low level of health  
103 care may be overburdened, with sometimes limited clinical skills and capacity for diagnosis,  
104 decentralized models of care require capacity-building and strengthening of clinical and  
105 treatment decision-making skills, which can be achieved by training, clinical mentoring and  
106 support supervision [18].

107  
108 WHO called for more data on the feasibility and acceptability of decentralized models of  
109 care in order to guide implementers and decision-makers [9]. Acceptability is a key  
110 implementation outcome, capturing the perceptions among specific stakeholders of  
111 whether and how a given service or practice is agreeable or satisfactory [19–21]. Evaluating  
112 acceptability provides insights as to barriers and facilitators of different services and  
113 interventions, which can be useful for implementers and decision makers. For instance, in  
114 South Africa, acceptability findings on a tuberculosis literacy and counselling intervention  
115 provided insight for designing a task shifting model for patient-centered interventions aimed

116 at improving retention within the cascade of tuberculosis care [22]. A multicenter study  
117 exploring the acceptability of a novel fixed-dose combination anti-tuberculosis drug reported  
118 on the good acceptance of this combination drug, but highlighted administration  
119 challenges, underlying the need to include structured initial and ongoing education and  
120 adherence support to caregivers, in future scale-up plans [23].

121  
122 In the field of the diagnosis of childhood tuberculosis, many implementation questions remain  
123 unanswered. How do PHC-based nurses or clinicians engage in nasopharyngeal aspiration  
124 and stool sample collection, or in chest X-ray reading and clinical diagnosis? Do perceptions  
125 of HCWs differ whether they are based at DH or PHC levels, in one country or the other, and  
126 how does context influence their acceptability of new services? In order to support the  
127 implementation of decentralized childhood tuberculosis services, we sought to assess the  
128 acceptability of decentralizing a comprehensive childhood tuberculosis diagnosis package  
129 among HCWs at low levels of care.

130

## 131 **Materials and Methods**

### 132 **Study design and setting**

133 As part of the TB-Speed Decentralization study, we conducted a multi-country and mixed  
134 methods, pre/post implementation research study. We report here on the post-intervention  
135 qualitative assessment.

136 The TB Speed Decentralization study aimed at assessing the impact on tuberculosis case  
137 detection of decentralizing a comprehensive childhood tuberculosis diagnosis package at  
138 DH and PHC-levels in countries with high tuberculosis incidence [24]. It was a before-after  
139 study, conducted between October 2019 and August 2022, in two rural or semi-urban health

140 districts of six countries, namely Cambodia, Cameroon, Côte d'Ivoire, Mozambique, Sierra  
141 Leone and Uganda, including 59 health facilities (12 DHs and 47 PHCs). Two levels of  
142 decentralization were implemented in each country. In DH-focused districts, the DH (1) and  
143 PHCs (4) conducted systematic symptom-based screening for tuberculosis among children,  
144 using simple questions asked either at triage and/or in consultation rooms. Children identified  
145 as presumptive tuberculosis at PHC-level were referred to DH (parents did not receive  
146 transport reimbursement) for Xpert MTB-RIF Ultra (Ultra) testing on nasopharyngeal aspirate,  
147 stool and/or expectorated sputum samples, as well as strengthened clinical evaluation,  
148 digital chest X-Ray with a simplified reading approach, and final diagnosis of tuberculosis.  
149 Details of the activities conducted by HCWs are presented in table 1. In PHC-focused districts,  
150 the DH and 4 PHCs were equipped to implement the comprehensive childhood tuberculosis  
151 diagnosis package; only chest X-Ray was done at DH-level in a proportion of children still  
152 symptomatic after a week (parents received transport reimbursement) and images were  
153 made available to clinicians in PHCs.

154

## 155 **Study population**

156 A purposive sample of 1 to 5 HCWs from each participating health facility, depending on the  
157 total staff number, was included. Participants targeted were medical doctors, nurses,  
158 clinicians/paramedics, radiographers, laboratory technicians, and community health  
159 workers. They were selected based on their role in the study interventions at the health facility  
160 (screening, clinical evaluation, sample collection, sample testing, performing or reading  
161 chest X-Ray), while aiming for gender balance.

162



## 163 **Data collection and ethical aspects**

164 Trained Social science research assistants (SSRAs) in each country liaised with the health  
165 facility in-charge or manager, to contact eligible HCWs and sought their written informed  
166 consent. Sociodemographic information was collected from all participating HCWs.  
167 Interviews were conducted face to face or by phone (when transport to site was impossible  
168 due to COVID-19 restrictions) and were recorded if respondents permitted. Interviews were  
169 conducted using a semi-structured guide exploring perceptions and experience of HCWs in  
170 implementing each component of the comprehensive childhood tuberculosis diagnosis  
171 package in their health facility (Supplementary material 1). Interview audios, transcripts and  
172 translated transcripts (if the interview was conducted in a language other than English) were  
173 uploaded on a secured FTPS server at University of Bordeaux, France. Study forms and codes  
174 were protected and only handled by study researchers. Multi-country data collection  
175 coordination meetings were conducted between SSRAs, the implementation research  
176 coordinator and the implementation research investigator after the first two interviews in  
177 each country, and on a regular basis to maximize the quality of interviews conducted. Study  
178 protocol and tools were approved by Inserm Institutional Review Board and WHO ethics  
179 advisory board at international level and each country ethics committees.

180

## 181 **Data analysis**

182 We conducted thematic analysis of the interviews. Deductive coding was conducted using  
183 a codebook derived from a) the interview guide topics – including each key component of  
184 the comprehensive childhood tuberculosis diagnosis package; and b) the Sekhon et al.  
185 Theoretical Framework of Acceptability [20] – this framework proposes seven key  
186 acceptability domains: affective attitude, burden, ethicality, intervention coherence,

187 perceived effectiveness, opportunity costs and self-efficacy. Data were coded within the  
188 NVivo Release qualitative data management software, QSR International Private Ltd. Version  
189 1.5, 2021. Multi-country intercoder reliability was maximized by SSRAs coding the same three  
190 transcripts and reviewing together the coded data. Findings were grouped into the  
191 deductive overarching thematic categories (a bi-dimensional matrix comprising the  
192 acceptability domains and the different tuberculosis diagnosis components), and  
193 summarized. Summaries were discussed with the country Principal Investigators, Program  
194 Managers and the International study coordinating investigators for their feedback and  
195 validation. During the interpretation process, findings were further categorized according to  
196 the levels of the Socio-Ecological Model [25,26].

197

## 198 **Results**

199 Individual interviews were conducted with 130 HCWs between June and August 2021. The  
200 median age of respondents was 36 years (IQR; 31, 41) and 71 (55%) were female (Table 2).  
201 HCWs were mostly from PHCs (72%). Globally, more than half of the HCWs interviewed were  
202 nurses, ranging from 31% in Uganda to 87% in Côte d'Ivoire. Most HCWs reported having  
203 conducted systematic screening for tuberculosis (77%), and half experienced conducting  
204 clinical evaluation.

205

206 We describe below acceptability findings per component of the comprehensive childhood  
207 tuberculosis diagnosis package. Table 3 presents emblematic quotes, organized according  
208 to the different acceptability domains proposed by the Sekhon framework.

209

## 210 Systematic screening

211 Almost all HCWs perceived systematic screening as a positive intervention contributing to  
212 improve awareness of childhood tuberculosis among HCWs and parents in health facilities.

213 *“It comes to arouse our attention to what is the screening of tuberculosis in children*  
214 *because this has been an Achille's heel for us. The nature of pediatric tuberculosis itself is*  
215 *very difficult to diagnose (Mozambique, DH, Nurse).*

216 HCWs appreciated that systematic screening allowed them to be proactive about finding  
217 children with presumptive tuberculosis.

218 *“Well, it must be said that systematic screening has made it possible to identify cases*  
219 *because before, for example, we had to wait for a subject who necessarily presented us*  
220 *with a cough, but with the screening of tuberculosis we saw that the other entry points,*  
221 *the other signs and symptoms that could also be used, and in particular weight loss in*  
222 *children (Côte d'Ivoire, DH, Doctor)*

223 Although the majority of HCWs were confident in performing systematic screening, some  
224 reported facing poor understanding, and sometimes reluctance from parents or  
225 accompanying persons (older children or grandparents) when responding to screening  
226 questions on weight loss, contact history, or days with fever. HCWs, especially those working  
227 at PHCs, found screening documentation burdensome in the context of busy schedules and  
228 competing priorities with insufficient staff.

229 *“The documents we fill out are too much. You do the screening and documents to fill out*  
230 *are many, so I find it difficult to remember, another staff fills them out. If we are two staff,*  
231 *we do it a whole morning. (...) Two staffs who explain and fill out many documents. It is*  
232 *not useless, but it is just waste of the time”. (Cambodia, DH-focused district, PHC, Nurse)*

233

## 234 **Nasopharyngeal aspirate collection**

235 Nasopharyngeal aspiration was perceived as an easy and innovative point-of-care  
236 respiratory sample collection method in children unable to expectorate sputum. HCWs found  
237 that nasopharyngeal aspiration was less invasive than other procedures.

238 *"It (nasopharyngeal aspiration) has helped in the sense that there are some children who*  
239 *cannot produce the sputum and you can only go through that method. Before I know*  
240 *they used to do the gastric tube and I think that's more painful than the nasopharyngeal*  
241 *aspiration" (Cameroon, DH, Nurse)*

242 Most HCWs, even at DH-level, did not have prior experience of nasopharyngeal aspiration.  
243 Some faced challenges with the procedure (collecting bloody samples for example),  
244 especially during initial days. But HCWs felt that training and practicum session had  
245 contributed to increase their skills and overall shared their satisfaction and confidence in  
246 performing nasopharyngeal aspiration.

247 *"Like for me, previously I told you that I was afraid to collect the NPA (nasopharyngeal*  
248 *aspirate) doing it through the nostril, you know, nostril. Fortunately for me, (name of*  
249 *country project manager) was here and I had two kids in front of them (project team),*  
250 *and I did one while they also did the other one. I learned from them" (Sierra Leone, PHC-*  
251 *focused district, PHC, Community Health Officer)*

252 Some HCWs shared concern about their lack of practice of nasopharyngeal aspiration during  
253 the COVID-19 pandemic and the related interruption in health services.

254 HCWs perceived that performing nasopharyngeal aspiration required some effort,  
255 associated with the duration of the procedure, the need to involve parents/colleagues (for  
256 restraining the baby/child during the procedure), managing discomfort caused to children,  
257 or preventing bloody samples.

258 *“But then the challenge is when the child is fighting, you have to get more than three*  
259 *people to assist you, whereby they need also the gadgets (i.e. equipment). Because there*  
260 *those ones of 8 years, 9 years, 10 years, they are powerful even when they are sick so you*  
261 *have to get people to assist you on performing that nasopharyngeal aspiration.”*  
262 *(Uganda, DH, Nurse).*

263 However, almost all HCWs, whether from DHs or PHCs, perceived nasopharyngeal aspiration  
264 as quick and efficient, contributing to diagnosis and treatment of tuberculosis.

265 *“It’s (nasopharyngeal aspiration) quick and you don’t have to handle it like we often do*  
266 *with sputum and stuff... It’s quick and they give you the results right away and if the child*  
267 *is sick, they put them on medication directly. We appreciated that” (Cameroon, PHC-*  
268 *focused district, PHC, General Practitioner).*

269

## 270 **Stool sample collection**

271 HCWs had positive attitudes towards stool sample collection. They perceived it as effective,  
272 with instances of positive tuberculosis results found on stool samples, whereas testing on  
273 nasopharyngeal aspirate had been negative. They acknowledged however that stool  
274 collection is mostly beyond their personal control as HCWs, and even that of parents, as  
275 children cannot produce stools on demand. They reported frustration towards parents  
276 delaying collection due to cultural practices, impossibility or unaffordability to travel long  
277 distances, or because of other priorities.

278 *“In our rural context, there are certain habits that can explain delays in getting stool*  
279 *samples; it is common practice for our mothers to give “evacuating enemas” to children.*  
280 *So, when the child arrives at the clinic he has already finished evacuating stools for the*  
281 *day. You have to wait until the next day and hope to be able to collect stool. Why are*  
282 *they doing this?” (Côte d’Ivoire, DH, doctor)*

283 Some HCWs underlined improper handling of stool samples and containers by parents, which  
284 was perceived as impairing sample processing at DH laboratory.

285 *"They (parents) did not much pay attention, often they took it full container, dirty and bad*  
286 *smell like that." (Cambodia, DH, Pediatric doctor)*

287

## 288 **Microbiological testing of samples with Xpert Ultra**

289 Ultra was perceived by all HCWs as a high quality and effective test to improve diagnosis  
290 (including identification of rifampicin resistance) and increase early childhood TB diagnosis.

291 *"What I can say is that Xpert is a method (...) that is helping a lot because it already gives*  
292 *us a lot of assurance for us to know that in fact it is negative, we are sure it is. If it's positive,*  
293 *it's positive. The sensitivity that the Xpert Ultra has is something really good. It's something*  
294 *good because it showed us that, for example, for the stools that we had are positive. It*  
295 *showed us that it is possible to detect the bacillus in an easier way and with other types*  
296 *of samples besides the expectoration and nasopharyngeal aspirates" (Mozambique, DH,*  
297 *General Medical Technician)*

298 The availability of childhood tuberculosis diagnosis through Ultra was reported as increasing  
299 the trust of parents towards HCWs and the quality of services provided at low levels of care.

300 *"The advantage is that children don't need to go to referral hospital. We can do it (Xpert)*  
301 *at the health facility. So, it promotes our health facility services. People are appreciating*  
302 *our service here, that we can provide many services. If they cannot seek services they*  
303 *want, our health facility will not be well spoken of, and we will have low service.*  
304 *(Cambodia, PHC-focused district, PHC, Midwife)*

305 HCWs operating in the laboratories were sometimes reluctant to process stool samples (at  
306 DH-level) or to test poor quality nasopharyngeal aspirates (especially at PHC-level). When

307 receiving large numbers of samples, or because of power cuts, they were faced with  
308 increased turnaround time, especially in PHCs equipped with one module Ultra machines.

309 *“The turnaround time is long because this machine runs about four samples a day, yet*  
310 *you find we have about fifteen samples to process in one day. In fact, it sometimes forces*  
311 *us to use ZN [Ziehl-Neelsen stain method for smear microscopy] instead of the GeneXpert*  
312 *machine for the sake of ensuring that other patients get their results in time.” (Uganda,*  
313 *PHC-focused district, PHC, Laboratory technician)*

314

## 315 **Referral of children and samples**

316 Most HCWs working at PHCs of DH-focused districts shared frustration with parents either  
317 refusing referral, fearing referral (associated in their minds with the severity of a disease) or  
318 being unable to reach DH due to distance and transportation challenges, or other priorities  
319 of their daily life/work.

320 *“Those who come they appreciated the (health) system (...) but the only problem if we*  
321 *ask them to go for further management, they raise a problem. They say that for me we*  
322 *don't have money, we have other children to look after so if I go there who will look after*  
323 *these young ones so, now I don't have anybody, they bring excuses.” (Uganda, DH-*  
324 *focused district, PHC, Nurse).*

325 This was particularly exacerbated during the COVID-19 pandemic, as parents did not easily  
326 go to DH due to fear of COVID-19 (most DHs being COVID management centres) and inability  
327 to travel in periods of lockdown.

328 Referral to DH was experienced as burdensome for HCWs at PHC-levels, especially when the  
329 child was accompanied by grand-parents/siblings (consent for referral could not be  
330 obtained). HCWs explained that parents required intensive referral counselling and

331 sometimes needed to be escorted to DH to ensure proper onwards management of their  
332 child.

333 *"Referral requires a lot of tact and time, and you have to flatter the patient so that he can*  
334 *go to DH. So, screening is easier than referral" (Cameroon, DH-focused district, PHC,*  
335 *Nurse)*

336 *"At the general hospital there are crowds of people, so always we have them (parents)*  
337 *accompanied by one of our collaborators, to be able to locate them. Otherwise when*  
338 *you tell them to go there themselves, they will go and sit in the hospital forever. (...) There*  
339 *are even difficulties, but I always take one of my collaborators, parents have to be*  
340 *supported" (Côte d'Ivoire, PHC-focused district, PHC, Nurse)*

341 In response to these challenges, some PHC-based HCWs explained that they sometimes  
342 ended up not referring parents to the DH at all.

343 HCWs from PHCs in the DH-focused districts also reported challenges in sending collected  
344 stool samples to DH. In Uganda, HCWs reported adapting to those barriers by referring both  
345 samples and patients to DH at the same time (parents being directly in charge of sample  
346 transport). Delays in receiving test results from DH for referred children, poor communication  
347 with HCWs at DH, and with parents of referred children, were some of the challenges  
348 experienced post-referral by HCWs of PHCs.

349

## 350 **Clinical evaluation**

351 HCWs shared positive attitudes towards clinical evaluation as a key step for diagnosing  
352 tuberculosis in a child. Clinical evaluation was perceived as complementary to laboratory  
353 and radiological tests, with each of these diagnostic "tools" playing a different role and being  
354 more or less prominent according to individual situations. Some HCWs reported conducting



355 more thorough clinical evaluation in search of tuberculosis, following a “gut feeling” that  
356 microbiological testing had failed to detect tuberculosis.

357 *“Yes, I think it really helps because the evidence is that we had one case where we didn't*  
358 *have a positive result with nasopharyngeal aspiration and with stool, but it was because*  
359 *of the clinical evaluation that we were able to explain that to our doctor, to the point*  
360 *where we sent the child to do the x-ray and it came back positive” (Cameroon, PHC-*  
361 *focused district, PHC, Nurse)*

362 HCWs reported collaborative discussions around the evaluation of children. Some HCWs from  
363 PHC level reported increased confidence in their clinical evaluation skills, following the  
364 decentralization of services and associated training and mentoring, being able to anticipate  
365 on a confirmatory final diagnosis from DH-level clinicians, regarding the children they referred.

366 *“Yes, I'm comforted by the fact that there are cases that have been sent to the district*  
367 *hospital with a high degree of certainty that they will be positive cases, based on clinical*  
368 *assessment. Because we investigate much more thoroughly and we know that the person*  
369 *is sick” (Cameroon, DH-focused district, PHC, General Practitioner)*

370

## 371 **Chest X-Ray**

372 The majority of HCWs valued chest X-Ray due to its contribution to the diagnosis of  
373 tuberculosis in children and improvement in their health status. They reported trusting chest  
374 X-Ray for decision-making and final diagnosis.

375 *“And because, you don't go into details because you are not a medical person, but we*  
376 *use the chest X-Ray to be our last resource to have our final diagnosis for the presumptive*  
377 *cases, so with that result now, when that result is out, it gives us the final diagnosis.” (Sierra*  
378 *Leone, DH, Nurse).*

379 For many HCWs, using chest X-Ray was a new clinical practice, and reading images was a  
380 new skill. HCWs appreciated the training, support and mentorship in increasing confidence  
381 and self-efficacy in performing and reading chest X-Rays.

382 *“After getting training on how to read chest X-Ray films, we thought it was a miracle. The*  
383 *first chest X-Ray result I read was negative. I am the one who read it and when the team*  
384 *from TB speed came for supervision, they said it was true and I was very happy. I have got*  
385 *some experience in reading chest X-Ray films although there are some challenges*  
386 *associated with it.” (Uganda, PHC-focused district, PHC, Nurse).*

387 However, HCWs from PHCs reported insufficient exposure in reading chest X-Rays as  
388 compared to DH-based HCWs. Some reported lack of feedback from DH about the child  
389 they referred for chest X-Ray, which resulted in lack of confidence and demotivation to refer  
390 children for chest X-Ray.

391 *“If we do it (CXR interpretation) more and more, I think, it is possible. We are skillful. But we*  
392 *do one and long time later do another one, I got some confusing. Yes, any work we do*  
393 *as routine, we know it well. But we do one, and a long time later we do another one, I*  
394 *get confused.” (Cambodia, PHC-focused district, PHC, Midwife)*

395 Referral to DH for chest X-Ray was perceived as challenging, despite of travel fees  
396 reimbursement provided to parents referred for chest X-Ray. Yet some HCWs perceived that  
397 establishing chest X-Ray at PHCs might not be adequate either.

398 *“Chest X-Ray can be done at the district hospital, so that the children we refer to the*  
399 *district hospital are able to access the service from that side (...). Because we receive few*  
400 *clients and it may not be cost effective to have the chest X-Ray machine at this facility”.*  
401 *(Uganda, DH-focused district, PHC, Clinical Officer).*

402

## 403 Discussion

404 In this multi-country qualitative study, HCWs shared overall positive perceptions of  
405 decentralizing a comprehensive childhood tuberculosis diagnosis package, appreciating  
406 their increased knowledge and skills, valuing each diagnostic tool and its contribution to  
407 improving diagnosis. This confirms the pre-intervention findings on the a priori acceptability of  
408 decentralized diagnosis of childhood tuberculosis among HCWs [27]. However, the  
409 experience of HCWs shared during individual interviews was more nuanced, with challenges  
410 reported, feelings of frustration and of being faced with many external barriers in  
411 implementing childhood tuberculosis diagnosis at low levels of care. Our study results show  
412 that the overall acceptability of decentralizing childhood tuberculosis diagnosis is influenced  
413 by individual, health system and structural factors (Table 4).

414  
415 At an individual level, the acceptability of the comprehensive childhood tuberculosis  
416 diagnosis package was driven by both emotional and rational/cognitive reasons. HCWs in all  
417 countries and all facilities shared feelings of hope that this comprehensive diagnosis package  
418 was effective and improving the detection of tuberculosis. Decentralizing the diagnosis of  
419 tuberculosis was perceived as ethical as services were brought closer to people, which  
420 meant increased coverage of services among children in need. HCWs were enthusiastic  
421 about the nasopharyngeal aspiration procedure: though causing discomfort and pain to  
422 children, it was perceived as less invasive than other sample collection methods for children,  
423 as reported elsewhere [15,28,29]. Nasopharyngeal aspiration was shown to be highly feasible  
424 in these decentralized contexts [30]. Most HCWs understood that even technical gestures  
425 could be performed at low levels of care and felt empowered to diagnose children. The  
426 importance of empowerment showed also in the fact that the acceptability of systematic  
427 screening seemed higher among HCWs who were responsible for further pursuing the

428 diagnosis process, i.e. in PHCs of PHC-focused districts, and lesser when required to refer  
429 children for further tests, i.e. PHCs of DH-focused districts.

430 HCWs appreciated the innovative and technical aspect of nasopharyngeal aspiration,  
431 feeling privileged to be able to provide such level of care; together with the presence of Ultra  
432 in their facilities, nasopharyngeal aspiration was seen as contributing to promote their facility  
433 and the quality of services offered. Support supervision, clinical mentoring, and problem  
434 solving from experts were reported as contributing to HCWs confidence and self-efficacy in  
435 adopting these new diagnosis services, and overcoming initial challenges. Investments in  
436 supportive systems for HCWs will be key to the successful implementation of diagnosis of  
437 tuberculosis at decentralized levels of care [31].

438 Finally, HCWs shared overall positive perceptions and experience of microbiological testing,  
439 which seemed to be related to them being able to observe some children being diagnosed  
440 for tuberculosis based on Ultra results. Acceptability of an intervention is indeed often related  
441 to its direct tangible positive consequences: in an international survey conducted in 2017  
442 among more than 700 clinical or laboratory experts, acceptance of novel diagnostic tests  
443 highly depended on test accuracy [32]. Yet, within the TB-Speed Decentralization study,  
444 microbiological yield was low [24].

445  
446 At facility or health system level, acceptability of providing diagnosis services at low levels of  
447 health care was challenged by perceived workload. The burden of systematic screening due  
448 to lack of sufficient HCWs and additional reporting and documentation tasks was reported  
449 almost unanimously among HCWs both at PHC and DH-levels. Shortage of staff in resource-  
450 limited settings is a common challenge and is indeed associated with limited time and  
451 capacity to deliver new services [33].

452

453 At a structural level, HCWs from PHCs shared frustration about not being able to collect stool  
454 samples or refer children to DH due to parents underestimating the need for care. Lack of  
455 community awareness about tuberculosis was reported as one of the factors related to  
456 delays in care seeking for tuberculosis and diagnosis in a study conducted in Indonesia [34].  
457 Many HCWs further reported that stigma associated with tuberculosis and fear of COVID-19  
458 may have prevented parents from accurately reporting on symptoms among their children  
459 at screening, as was shown recently in Ghana [35]. Transport, distance, and electricity supply  
460 were repeatedly mentioned as barriers to the acceptability of decentralization, hampering  
461 referral of patients – including for chest X-Ray, samples and test results between PHCs and  
462 DHs, in both directions. Distance and transportation barriers are common challenges for  
463 tuberculosis programs in low- and middle-income countries [36,37]. Novel stool testing  
464 procedures with minimum processing steps [38] could be established at PHCs level and  
465 improve the acceptability, and feasibility, of decentralized childhood TB diagnosis. Finally,  
466 limited and unstable electricity coverage further constrained the acceptability and feasibility  
467 of implementing chest X-Ray at DH. These findings highlight the complexity of the process of  
468 decentralization, that goes beyond the acceptability of services, and beyond the mere  
469 provision of services, with closer availability: decentralization of childhood tuberculosis  
470 diagnosis also touches on the capacity of a whole economic system to support this  
471 approach, and the capacity of end-users to take on the offer [39].

472  
473 Our study has several limitations. First, we did not include in our study population  
474 representatives of all key HCWs involved, in each country, in decentralizing the  
475 comprehensive childhood tuberculosis diagnosis approach. This was mainly the case among  
476 medical doctors and skilled clinicians, unavailable for study participation due to high  
477 workload or being absent onsite during data collection. As a consequence, we may have

478 missed some specific insight from key actors. Second, we used a standardized interview  
479 guide, and SSRAs, although trained, may have been reluctant to explore in details some issues  
480 specific to their country. Third, country-specific expressions and views may have been  
481 simplified or distorted during the translation to English process. Fourth, the cultural differences  
482 between countries, in the way SSRAs conducted interviews and asked follow-up questions,  
483 and in the way HCWs expressed their ideas, feelings and experiences, may have influenced  
484 the interpretation of findings. And finally, the aim of providing a multi-country assessment of  
485 acceptability, highlighting common features across countries, may have led to some over-  
486 simplification of findings, some being more relevant to certain settings than others. These are  
487 common challenges reported during multi-country studies and analysis [40].

488  
489 The multi-country design of our study also constitutes one of the major strengths of this work.  
490 Indeed, it provides insight into the perceptions and experiences of HCWs working in different  
491 health care systems, different socioeconomic and cultural contexts. Together with the large  
492 sample size, this contributes to the generalizability of our study findings. Furthermore, we were  
493 able to interview HCWs, from both PHC and DH levels, who were directly involved in delivering  
494 the different components (from screening to clinical evaluation) of the diagnosis package,  
495 thus providing informed and first-hand feedback on their experience. Interviews were  
496 conducted by SSRAs who were not directly involved in implementing the study interventions,  
497 possibly facilitating free expression from HCWs, minimizing social desirability bias. We  
498 conducted multi-country analyses on the basis of first country-specific analyses and then  
499 overall study analysis, as a group of multi-country social scientists, combining, comparing and  
500 contrasting viewpoints and interpretations, thus maximizing the validity of findings. We used  
501 an existing and globally used framework of acceptability for analysis, thus contributing to the  
502 comparability of our findings with other studies. Finally, our study provides original data on the

503 acceptability of decentralizing a comprehensive childhood tuberculosis diagnosis package  
504 from the perspective of frontline HCWs, and in a context of paucity of implementation data  
505 on how to implement childhood TB diagnosis approaches in the field.

506

## 507 **Conclusion**

508 In this multi-country qualitative study, HCWs at DH and PHC-levels perceived and  
509 experienced decentralized childhood tuberculosis diagnosis as acceptable, in every sense  
510 of the word. Implementation however seemed to be hampered by several operational and  
511 feasibility issues. Among others, our study findings call for innovative referral mechanisms for  
512 patients, samples and chest X-Ray in order to ensure sustainability and scalability of  
513 decentralized interventions for diagnosing childhood tuberculosis.

514

## 515 **Acknowledgements**

516 The authors would like to thank all HCWs who took the time and consented to take part in the  
517 interview process, as well as all TB-Speed staff in the field who coordinated this qualitative  
518 study, many of whom are listed as part of the TB-Speed Decentralization Study Group. Special  
519 thanks to Monica Koroma from Solthis in Sierra Leone for her contribution to early stages of  
520 the acceptability data collection. We thank the members of the TB-Speed Scientific Advisory  
521 Board who gave technical advice on the design of the study and approved the protocol  
522 (see TB-Speed Decentralization study group list); the Ministries of Health and national TB  
523 programs (NTPs) of participating countries; and the NTP district representatives who  
524 supported the TB-Speed Decentralization Study implementation.

525 / Ethics statement / \* / This study is part of clinical study C18-25 sponsored by Inserm (Institut  
526 National de la Santé et de la Recherche Médicale, Paris, France). It was granted approval

527 by the Inserm Institutional Review Board (IRB00003888) and WHO ethics advisory board at  
528 international level and each country ethics committees and registered in a public study  
529 registry (NCT04038632). All study participants gave their informed, written consent to  
530 participation, in line with ethical guidelines. The TB-Speed Decentralization Study is funded by  
531 UNITAID. The funders and sponsor did not play any role in the study design; data collection,  
532 data management, data analysis, data interpretation; report writing or the decision to submit  
533 reports for publication.

534

### 535 **TB-Speed Decentralization Study Group**

536 **Institut Pasteur du Cambodge, Epidemiology and Public Health Unit, Phnom Penh, Cambodia:**

537 BORAND Laurence, DE LAUZANNE Agathe, DIM Bunnet, HEANG Seyla, KAING Sanary, KEANG  
538 Chanty, LY Socheat, MEAS Pichpiseth, NHOUENG Sovann, PRING Long, SRENG Vouchleang, YIN  
539 Song, KAING Sanary, PHAN Chanvirak, CHRENG Chanra, SARITH Channimol

540 **National Center for Tuberculosis and Leprosy Control, Phnom Penh, Cambodia:** MAO Tan Eang

541 **IRD, Yaoundé, Cameroon:** AMBOUA SCHOUAME Audrey, BABEY Clifford, EDEN NGU Masama,  
542 GEUNOU Etienne, KWEDI NOLNA Sylvie, MBANG MASSOM Douglas, MELINGUI Bernard Fortune,  
543 NGA ELOMO Nadia

544 **Programme National de Lutte contre la Tuberculose (PNLT), Yaoundé, Cameroon:** MBASSA Vincent

545 **Mother and child Centre, Chantal Biya Foundation, Yaoundé, Cameroon:** TAGUEBUE Jean-Voisin

546 **PACCI, Abidjan, Côte d'Ivoire:** AKA BONY Roger, BANGA Marie-France Larissa, BOUZIÉ Olivier,  
547 DANHO Serge, DION Alphonse, GOGOUA Saulé Melissa, KOMENA Auguste Eric, KOUADIO  
548 Christian, KOUAME Abel Arkason, MOH Raoul, NGUESSAN Marcelle Sandrine, SILOUÉ Bertine, YAO  
549 Yapi Cyrille Prisca

550 **Programme National de Lutte contre la Tuberculose (PNLT), Abidjan, Côte d'Ivoire:** KOUAKOU

551 Jacquemin



552 **University of Bordeaux, National Institute for Health and Medical Research (INSERM) UMR 1219,**  
553 **Research Institute for Sustainable Development (IRD) EMR 271, Bordeaux Population Health Centre,**  
554 **Bordeaux, France:** BALESTRE Eric, BEUSCART Aurélie, CHARPIN Aurélie, D'ELBEE Marc, FONT Hélène,  
555 JOSHI Basant, KOSKAS Nicolas, MARCY Olivier, OCCELLI Estelle, ORNE-GLIEMANN Joanna,  
556 POUBLAN Julien, VERNOUX Elodie

557 **University of Montpellier, IRD, INSERM, TRANSVIH MI, Montpellier, France:** BONNET Maryline,  
558 CHAUVET Savine, LOUNNAS Manon

559 **Solthis, Paris, France:** BRETON Guillaume

560 **TeAM SPI, France:** NORVAL Pierre-Yves

561 **Instituto Nacional de Saúde, Maputo, Mozambique:** CASSY Sheyla, CUMBE Saniata, MATSINHE  
562 Mércia, KHOSA Celso, MABOTE Nairo, MACHAVA Salvador, MACHONISSE Emelva, ZITA Alcina,  
563 CHIÚLE Válder, VOSS DE LIMA Yara

564 **Solthis, Freetown, Sierra Leone:** BEYAN Prince, FLOMO Benjamin M., JALLOH Joseph Abubakarr,  
565 KAMARA Ishmael, KOROMA Monica G, LAMIN Mohamed, MATATA Lena, MUGISHA Jacob Ross,  
566 SENESIE Christiana M, SESAY Sheriff, TAMBA KAMARA Egerton

567 **Ola During Children's Hospital, Freetown, Sierra Leone:** MUSTAPHA Ayeshatu

568 **National Leprosy and TB Control Programme (NLTCP), Freetown, Sierra Leone:** FORAY Lynda

569 **MUJHU Research Collaboration, MU-JHU Care Limited, Kampala, Uganda:** AGONDEZE Sandra,  
570 KOBUSINGYE Agnes, NAMFUKA Mastula, NAMULINDA Faith, WOBUDEYA Eric

571 **Epicentre Mbarara Research Centre, Mbarara, Uganda:** ARINAITWE Rinah, ABOK Florence,  
572 KAITANO Rodney, KAKURU Ronald, KASUJJA Martin, MWANGA-AMUMPAIRE Juliet, MWESIGWA  
573 Evans, NAKAZZI Claire, NATUKUNDA Naome, NUWAMANYA Simpson, NYANGOMA Miria,  
574 OGWANG Charles, ORIKIRIZA Patrick, TUMWIJUKYE Johnbosco, TURYASHEMERERWA Esther

575 **National Tuberculosis and Leprosy Program, Kampala, Uganda:** SEKADDE Moorine, TURYAHABWE  
576 Stavia

577 **Scientific Advisory Board:** CHABALA Chishala (University of Zambia), CUEVAS Luis (Liverpool School  
578 of Tropical Medicine, UK), DELACOURT Christophe (Hôpital Necker-Enfants Malades, France),  
579 GRAHAM Steve (Chair; University of Melbourne, Melbourne, Australia), GRZEMSKA Malgorzata and  
580 VERKUIJL Sabine (WHO, Switzerland), HESSELING Anneke (Stellenbosch University, Cape Town,  
581 South Africa), MALECHE-OBIMBO Elizabeth (University of Nairobi, Kenya), MUSOKE Philippa  
582 (Makerere University, Uganda), NICOL Mark (University of Western Australia, Perth, Australia); MAO  
583 Tan Eang (CENAT, Phnom Penh, Cambodia).

584

## 585 **Conflict of interests**

586 No authors have any competing interests.

587

## 588 **Author contribution**

589 JOG, OM, MB, EW wrote the study protocol. BJ and JOG designed the data collection tools  
590 provided training and coordinated the social sciences research assistants, and monitored  
591 data collection. BJ, SK, DMM, MFB, YVL, MK conducted the interviews and managed the  
592 qualitative data. BJ, SK, DMM, MFB, YVL, ETK, SS and JOG conducted data analysis. BJ drafted  
593 the manuscript. JOG and OM reviewed the manuscript. All authors read and approved the  
594 final manuscript.

595

## 596 **References**

- 597 1. World Health Organization. Global Tuberculosis Report. Geneva, Switzerland; 2022.  
598 Available from: <https://www.who.int/publications/i/item/9789240061729>. [Access  
599 date: 07/06/2022]
- 600 2. Dodd PJ, Yuen CM, Sismanidis C, Seddon JA, Jenkins HE. The global burden of  
601 tuberculosis mortality in children: a mathematical modelling study. *Lancet Glob Health*.  
602 2017 Sep 1;5(9):e898–906. doi: 10.1016/S2214-109X(17)30289-9

- 603 3. Godreuil S, Marcy O, Wobudeya E, Bonnet M, Solassol J. Tackling mortality due to  
604 childhood tuberculosis. *Lancet Public Health*. 2018;3(4):e165. doi: 10.1016/S2468-  
605 2667(18)30049-5
- 606 4. Detjen AK, DiNardo AR, Leyden J, Steingart KR, Menzies D, Schiller I, Dendukuri N and  
607 MA. Xpert MTB/RIF assay for the diagnosis of pulmonary tuberculosis in children: a  
608 systematic review and meta-analysis. *Lancet Respir Med*. 2015;3(6):451–61. doi:  
609 10.1016/S2213-2600(15)00095-8
- 610 5. Graham SM. Chest radiography for diagnosis of tuberculosis in children: A problem of  
611 interpretation. *International Journal of Tuberculosis and Lung Disease*. 2014;18(7):757.  
612 doi: 10.5588/ijtld.14.0354
- 613 6. Ritz N, Curtis N. Novel concepts in the epidemiology, diagnosis and prevention of  
614 childhood tuberculosis. *Swiss Med Wkly*. 2014;144(w14000):1–8. doi:  
615 10.4414/smw.2014.14000
- 616 7. Marais BJ, Verkuijl S, Casenghi M, Triasih Ri, Hesselting AC, et al. Paediatric tuberculosis  
617 – new advances to close persistent gaps. *International Journal of Infectious Diseases*.  
618 2021;113:S63–7. doi: 10.1016/j.ijid.2021.02.003
- 619 8. World Health Organization. Operational handbook on tuberculosis. Module 5:  
620 Management of tuberculosis in children and adolescents. Geneva, Switzerland; 2022.  
621 Available from: <https://www.who.int/publications/i/item/9789240046832>. [Access  
622 date: 14/08/2022]
- 623 9. World Health Organization. WHO consolidated guidelines on tuberculosis. Module 5:  
624 Management of tuberculosis in children and adolescents. Geneva, Switzerland; 2022.  
625 Available from: <https://www.who.int/publications/i/item/9789240046764>. [Access  
626 date: 16/08/2022]
- 627 10. Zawedde-Muyanja S, Nakanwagi A, Dongo JP, Sekadde MP, Nyinoburyo R, et al.  
628 Decentralisation of child tuberculosis services increases case finding and uptake of  
629 preventive therapy in Uganda. *International Journal of Tuberculosis and Lung Disease*.  
630 2018;22(11):1314–21. doi: 10.5588/ijtld.18.0025
- 631 11. Talukder K, Salim MAH, Jerin I, Sharmin F, Talukder MQ-K, Marais BJ, Nandi P, Cooreman  
632 E RM. Intervention to increase detection of childhood tuberculosis in Bangladesh. *Int J  
633 Tuberc Lung Dis*. 2012;16(1):70–5. doi: 10.5588/ijtld.11.0060
- 634 12. Maha A, Majumdar SS, Main S, Phillip W, Witari K, Schulz J CP. The effects of  
635 decentralisation of tuberculosis services in the East New Britain Province, Papua New  
636 Guinea. *Public Health Action*. 2019;9 (S1):S43–9. doi: 10.5588/pha.18.0070
- 637 13. Oshi DC, Chukwu J, CC. N, Meka AO, Madichie NO, et al. Does intensified case finding  
638 increase tuberculosis case notification among children in resource-poor settings? A  
639 report from Nigeria. *Int J Mycobacteriol*. 2016;5(1):44–50. doi:  
640 10.1016/j.ijmyco.2015.10.007
- 641 14. World Health Organisation. Health system decentralization: concepts, issues and  
642 country experience [Internet]. Geneva, Switzerland; 1990. Available from:  
643 <https://apps.who.int/iris/handle/10665/39053>. [Access date: 09/10/2022]
- 644 15. Wobudeya E, Bonnet M, Walters EG, Nabeta P, Song R, et al. Diagnostic Advances in  
645 Childhood Tuberculosis—Improving Specimen Collection and Yield of Microbiological  
646 Diagnosis for Intrathoracic Tuberculosis. *Pathogens*. 2022;11(4):389. doi:  
647 10.3390/pathogens11040389
- 648 16. World Health Organization. Chest Radiography in Tuberculosis. Geneva, Switzerland;  
649 2016. Available from: <https://apps.who.int/iris/handle/10665/252424>. [Access date:  
650 06/08/2022]
- 651 17. Qin ZZ, Sander MS, Rai B, Titahong CN, Sudrungrot S, et al. Using artificial intelligence to  
652 read chest radiographs for tuberculosis detection: A multi-site evaluation of the

- 653 diagnostic accuracy of three deep learning systems. *Sci Rep.* 2019;9(1):1–10. doi:  
654 10.1038/s41598-019-51503-3
- 655 18. Wandwalo E, Kamara D v., Yassin MA, Morrison L, Nwaneri NB, et al. Enhancing  
656 Tuberculosis Case-Finding: A Case of Quality Improvement Initiative in Tanzania. *Trop*  
657 *Med Infect Dis.* 2022;7(6):1–7. doi: 10.3390/tropicalmed7060097
- 658 19. Proctor E, Silmere H, Raghavan R, Hovmand P, Aarons G, et al. Outcomes for  
659 implementation research: Conceptual distinctions, measurement challenges, and  
660 research agenda. *Administration and Policy in Mental Health and Mental Health*  
661 *Services Research.* 2011;38(2):65–76. doi: 10.1007/s10488-010-0319-7
- 662 20. Sekhon M, Cartwright M, Francis JJ. Acceptability of healthcare interventions: An  
663 overview of reviews and development of a theoretical framework. *BMC Health Serv*  
664 *Res.* 2017;17(88):1–13. doi: 10.1186/s12913-017-2031-8
- 665 21. Peters DH, Adam T, Alonge O. Implementation research : what it is and how to do it.  
666 *BMJ.* 2013;6753(November):1–7. doi: 10.1136/bmj.f6753
- 667 22. Law S, Seepamore B, Oxlade O, Sikhakhane N, Dawood H, et al. Acceptability,  
668 feasibility, and impact of a pilot tuberculosis literacy and treatment counselling  
669 intervention: a mixed methods study. *BMC Infect Dis.* 2021;21(1):1–13. doi:  
670 10.1186/s12879-021-06136-1
- 671 23. Wademan DT, Busakwe L, Nicholson TJ, van der Zalm M, Palmer M, et al. Acceptability  
672 of a first-line anti-tuberculosis formulation for children: Qualitative data from the SHINE  
673 trial. *International Journal of Tuberculosis and Lung Disease.* 2019;23(12):1263–8. doi:  
674 10.5588/ijtld.19.0115
- 675 24. Wobudeya E, Nanfuka M, Huyen Ton Nu Nguyet M, Mwangi J, Taguebue J, Breton G,  
676 Moh R, Khosa C, Borand L, Orne-Gliemann J, Bonnet M, Marcy O for the T-SD study  
677 group. Impact of decentralizing childhood TB diagnosis approaches at primary hospital  
678 level on case detection in high TB burden countries. In *World Conference On Lung*  
679 *Health, 2022 of The International Union Against Tuberculosis And Lung Disease(The*  
680 *UNION)*; 2022. p. S290.
- 681 25. Mcleroy KR, Bibeau D, Steckler A, Glanz K. An Ecological Perspective on Health  
682 Promotion Programs. *Health Education & Behavior.* 1988;15(4):351–77. doi:  
683 10.1177/109019818801500401
- 684 26. Golden SD, Earp JAL. Social Ecological Approaches to Individuals and Their Contexts:  
685 Twenty Years of Health Education & Behavior Health Promotion Interventions. *Health*  
686 *Education and Behavior.* 2012;39(3):364–72. doi: 10.1177/1090198111418634
- 687 27. Joshi B, Font H, Wobudeya E, Nanfuka M, Kobusingye A, et al. Knowledge, attitudes  
688 and practices on childhood TB among healthcare workers. *Int J Tuberc Lung Dis.*  
689 2022;26(3):243–51. doi: 10.5588/ijtld.21.0317
- 690 28. Nicol MP; ZHJ. New specimens and laboratory diagnostics for childhood pulmonary TB:  
691 progress and prospects. *Paediatr Respir Rev.* 2012;12(1):16–21. doi:  
692 10.1016/j.prrv.2010.09.008.New
- 693 29. Owens S, Abdel-Rahman IE, Balyejusa S, Musoke P, Cooke RPD, Parry CM CJ.  
694 Nasopharyngeal aspiration for diagnosis of pulmonary tuberculosis. *Arch Dis Child.*  
695 2007;92:693–6. doi: 10.1136/adc.2006.108308
- 696 30. Sanogo B, Kiema PE, Barro M, Nacro SF, Ouermi SA, et al. Contribution and  
697 Acceptability of Bacteriological Collection Tools in the Diagnosis of Tuberculosis in  
698 Children Infected with HIV. *J Trop Pediatr.* 2021;67(2):1–9. doi: 10.1093/tropej/fmab027
- 699 31. Ngabonzima A, Kenyon C, Kpienbaareh D, Luginaah I, Mukunde G, et al. Developing  
700 and implementing a model of equitable distribution of mentorship in districts with  
701 spatial inequities and maldistribution of human resources for maternal and newborn

- 702 care in Rwanda. *BMC Health Serv Res.* 2021;21(1):1–12. doi: 10.1186/s12913-021-06764-  
703 y
- 704 32. Amicosante M, D'Ambrosio L, Munoz M, Mello FC de Q, Tebruegge M, et al. Current  
705 use and acceptability of novel diagnostic tests for active tuberculosis: a worldwide  
706 survey. *Jornal Brasileiro de Pneumologia.* 2017;43(5):380–92. doi: 10.1590/s1806-  
707 37562017000000219
- 708 33. Aluko JO, Anthea R, Marie Modeste RR. Manpower capacity and reasons for staff  
709 shortage in primary health care maternity centres in Nigeria: a mixed-methods study.  
710 *BMC Health Serv Res.* 2019;19(1):1–15. doi: 10.1186/s12913-018-3819-x
- 711 34. Dewi C, Barclay L, Passey M, Wilson S. Improving knowledge and behaviours related to  
712 the cause, transmission and prevention of Tuberculosis and early case detection: A  
713 descriptive study of community led Tuberculosis program in Flores, Indonesia. *BMC*  
714 *Public Health.* 2016;16(1):1–12. doi: 10.1186/s12889-016-3448-4
- 715 35. Der JB, Grant AD, Grint D, Narh CT, Bonsu F, et al. Barriers to tuberculosis case finding in  
716 primary and secondary health facilities in Ghana: perceptions, experiences and  
717 practices of healthcare workers. *BMC Health Serv Res.* 2022;22(1):1–14. doi:  
718 10.1186/s12913-022-07711-1
- 719 36. Kuupiel D, Adu KM, Apiribu F, Bawontuo V, Adogboba DA, et al. Geographic  
720 accessibility to public health facilities providing tuberculosis testing services at point-of-  
721 care in the upper east region, Ghana. *BMC Public Health.* 2019;19(718):1–12. doi:  
722 10.1186/s12889-019-7052-2
- 723 37. Finnie RKC, Khoza LB, van den Borne B, Mabunda T, Abotchie P, et al. Revue  
724 systématique: Facteurs associés au patient et au système de santé dans le retard du  
725 diagnostic et du traitement de la tuberculose dans les pays d'Afrique subsaharienne à  
726 forte charge de TB et VIH. *Tropical Medicine and International Health.* 2011;16(4):394–  
727 411. doi: 10.1111/j.1365-3156.2010.02718.x
- 728 38. Haas P, Yenew B, Mengesha E, Slyzkyi A, Gashu Z, et al. The simple one-step (sos) stool  
729 processing method for use with the xpert mtb/rif assay for a child-friendly diagnosis of  
730 tuberculosis closer to the point of care. *J Clin Microbiol.* 2021 ; 59(8):1–11. doi:  
731 10.1128/JCM.00406-21
- 732 39. Zamorano P, Muñoz P, Espinoza M, Tellez A, Varela T, et al. Impact of a high-risk  
733 multimorbidity integrated care implemented at the public health system in Chile. *PLoS*  
734 *One.* 2022;17(1 January 2022):1–12. doi: 10.1371/journal.pone.0261953
- 735 40. Salway SM, Higginbottom G, Reime B, Bharj KK, Chowbey P, et al. Contributions and  
736 challenges of cross-national comparative research in migration, ethnicity and health:  
737 Insights from a preliminary study of maternal health in Germany, Canada and the UK.  
738 *BMC Public Health.* 2011;11(1):514. doi: 10.1186/1471-2458-11-514  
739  
740  
741

Table 1. Comprehensive childhood tuberculosis diagnosis package. TB-Speed Decentralization study (2018-22)

| Diagnosis component          | Target population                                                                | Person in charge                                                             | Location                                              | Detail of activity                                                                                                                                                                                              | DH-focused strategy |     | PHC-focused strategy |     |
|------------------------------|----------------------------------------------------------------------------------|------------------------------------------------------------------------------|-------------------------------------------------------|-----------------------------------------------------------------------------------------------------------------------------------------------------------------------------------------------------------------|---------------------|-----|----------------------|-----|
|                              |                                                                                  |                                                                              |                                                       |                                                                                                                                                                                                                 | DH                  | PHC | DH                   | PHC |
| <b>TB-Screening</b>          | All sick children attending the health facilities                                | Screeener (trained lay health care), Nurse, Nurse assistant                  | Triage or consultation room                           | Screening questions:<br>(1) Cough > 2 weeks<br>(2) Fever > 2 weeks<br>(3) Documented weight loss<br>(4) Contact with a person with tuberculosis and any cough<br>Facility or study specific screening registers | X                   | X   | X                    | X   |
| <b>Sample collection</b>     | Children with presumptive tuberculosis                                           | Nurse, Nurse assistant, Midwife                                              | Sample collection room, consultation room, laboratory | Microbiological samples: nasopharyngeal aspirate & stool or expectorated sputum                                                                                                                                 | X                   |     | X                    | X   |
| <b>Sample testing-</b>       |                                                                                  | Laboratory technician (DH)<br>Nurses/midwives or laboratory technician (PHC) |                                                       | Xpert MTB/RIF Ultra on:<br>- Battery-operated G1 Edge (PHC)<br>- Standard GeneXpert (DH)                                                                                                                        | X                   |     | X                    | X   |
| <b>Clinical evaluation</b>   |                                                                                  | Clinician, nurse, medical doctor                                             | Consultation room                                     | Standardized medical charts with symptoms and signs of tuberculosis.<br>In Uganda NTP algorithm for the diagnosis of tuberculosis                                                                               | X                   |     | X                    | X   |
| <b>Optimized chest X-Ray</b> | All children with presumptive tuberculosis (DH)<br>Still symptomatic at D7 (PHC) | Radiographer or clinician                                                    | Radiology department, consultation room               | Digital chest X-Ray & simplified reading<br>(1) Enlarged lymph nodes<br>(2) Alveolar opacity<br>(3) Airways compression<br>(4) Miliary<br>(5) Cavitation<br>Pleural or pericardial effusion                     | X                   |     | X                    |     |

DH: District Hospital, PHC: Primary Health Clinic

Table 2. Sociodemographic information of HCWs interviewed, TB-Speed Decentralization study, 2021

| Variables                             | Cambodia<br>(N= 20)<br>n (%) | Cameroon<br>(N= 24)<br>n (%) | Côte d'Ivoire<br>(N=16)<br>n (%) | Mozambique<br>(N= 19)<br>N (%) | Sierra Leone<br>(N= 22)<br>n (%) | Uganda<br>(N= 29)<br>n (%) | Total<br>(N=130)<br>n (%) |
|---------------------------------------|------------------------------|------------------------------|----------------------------------|--------------------------------|----------------------------------|----------------------------|---------------------------|
| Gender                                |                              |                              |                                  |                                |                                  |                            |                           |
| Male                                  | 10 (50)                      | 10 (42)                      | 14 (88)                          | 5 (26)                         | 6 (27)                           | 14 (48)                    | 59 (45)                   |
| Female                                | 10 (50)                      | 14 (58)                      | 2 (12)                           | 14 (74)                        | 16 (73)                          | 15 (52)                    | 71 (55)                   |
| Age (Years)- Median (IQR)             | 33 (29-43)                   | 33 (30-41)                   | 37 (34-43)                       | 33 (28-38)                     | 37 (32-42)                       | 37 (33-40)                 | 36 (31-41)                |
| Type of decentralization              |                              |                              |                                  |                                |                                  |                            |                           |
| DH-focused                            | 10 (50)                      | 13 (54)                      | 9 (56)                           | 10 (53)                        | 12 (55)                          | 14 (48)                    | 68 (52)                   |
| PHC-focused                           | 10 (50)                      | 11 (46)                      | 7 (44)                           | 9 (47)                         | 10 (45)                          | 15 (52)                    | 62 (48)                   |
| Type of health facility               |                              |                              |                                  |                                |                                  |                            |                           |
| District hospital                     | 7 (35)                       | 6 (25)                       | 3 (19)                           | 5 (26)                         | 6 (27)                           | 10 (34)                    | 37 (28)                   |
| Primary Health Clinic                 | 13 (65)                      | 18 (75)                      | 13 (81)                          | 14 (74)                        | 16 (73)                          | 19 (66)                    | 93 (72)                   |
| Position                              |                              |                              |                                  |                                |                                  |                            |                           |
| Medical doctor                        | 3 (15)                       | 5 (21)                       | 2 (13)                           | 1 (6)                          | 0 (0)                            | 2 (7)                      | 13 (10)                   |
| Clinician/Paramedics                  | 0 (0)                        | 0 (0)                        | 0 (0)                            | 9 (47)                         | 9 (41)                           | 5 (17)                     | 23 (18)                   |
| Nurse/Nursing assistant               | 8 (40)                       | 19 (79)                      | 14 (87)                          | 9 (47)                         | 10 (45)                          | 9 (31)                     | 69 (53)                   |
| Midwife                               | 6 (30)                       | 0 (0)                        | 0 (0)                            | 0 (0)                          | 1 (5)                            | 0 (0)                      | 7 (5)                     |
| Laboratory technologist               | 1 (5)                        | 0 (0)                        | 0 (0)                            | 0 (0)                          | 2 (9)                            | 6 (21)                     | 9 (6)                     |
| Radiographer                          | 0 (0)                        | 0 (0)                        | 0 (0)                            | 0 (0)                          | 0 (0)                            | 2 (7)                      | 2 (2)                     |
| Screener                              | 0 (0)                        | 0 (0)                        | 0 (0)                            | 0 (0)                          | 0 (0)                            | 5 (17)                     | 5 (4)                     |
| Other                                 | 2 (10)                       | 0 (0)                        | 0 (0)                            | 0 (0)                          | 0 (0)                            | 0 (0)                      | 2 (2)                     |
| Experience in the health facility     |                              |                              |                                  |                                |                                  |                            |                           |
| < 1 year                              | 0 (0)                        | 2 (8)                        | 4 (25)                           | 0 (0)                          | 0 (0)                            | 2 (7)                      | 8 (6)                     |
| 1 to 5 years                          | 8 (40)                       | 15 (63)                      | 5 (31)                           | 8 (42)                         | 16 (73)                          | 20 (69)                    | 72 (55)                   |
| 5 to 10 years                         | 6 (30)                       | 2 (8)                        | 4 (25)                           | 6 (32)                         | 4 (18)                           | 0 (0)                      | 22 (17)                   |
| > 10 years                            | 6 (30)                       | 5 (21)                       | 3 (19)                           | 5 (26)                         | 2 (9)                            | 7 (24)                     | 28 (22)                   |
| Involvement in intervention component |                              |                              |                                  |                                |                                  |                            |                           |
| Systematic screening                  | 14 (70)                      | 22 (92)                      | 16 (100)                         | 12 (63)                        | 20 (91)                          | 16 (55)                    | 100 (77)                  |
| Nasopharyngeal aspiration             | 9 (45)                       | 13 (54)                      | 9 (56)                           | 5 (26)                         | 11 (50)                          | 11 (38)                    | 58 (45)                   |

|                                                  |         |         |        |         |         |         |         |
|--------------------------------------------------|---------|---------|--------|---------|---------|---------|---------|
| Stool sample collection                          | 11 (55) | 15 (63) | 6 (38) | 5 (26)  | 12 (55) | 7 (24)  | 56 (43) |
| Microbiological testing<br>(Xpert MTB-RIF Ultra) | 8 (40)  | 5 (21)  | 8 (50) | 10 (53) | 7 (32)  | 8 (28)  | 46 (35) |
| Chest X-Ray                                      | 12 (60) | 5 (21)  | 8 (50) | 10 (53) | 5 (23)  | 14 (48) | 54 (42) |
| Clinical evaluation                              | 7 (35)  | 10 (42) | 4 (25) | 15 (79) | 21 (95) | 12 (41) | 69 (53) |



**Table 3.** Acceptability of decentralizing a comprehensive childhood tuberculosis diagnosis package in six low-income and high burden countries (2017-2022). Quotes organised according to the Sekhon Theoretical Framework of Acceptability.

| <b>Acceptability domain</b>    | <b>Diagnosis component</b>       | <b>Illustrative quotes</b>                                                                                                                                                                                                                                                                                                                                                                                                                                                                                                                                                                                                                                                                                                                                                                                                         |
|--------------------------------|----------------------------------|------------------------------------------------------------------------------------------------------------------------------------------------------------------------------------------------------------------------------------------------------------------------------------------------------------------------------------------------------------------------------------------------------------------------------------------------------------------------------------------------------------------------------------------------------------------------------------------------------------------------------------------------------------------------------------------------------------------------------------------------------------------------------------------------------------------------------------|
| <b>Affective attitude</b>      | <b>Screening</b>                 | <i>"The feelings? Well, they are feelings of joy, it (screening) helped us and we really took it with joy because (...) if this project was not there, we were really going to let children go, perhaps we were going to treat them for other pathologies whereas it was tuberculosis that was tiring them" (Côte d'Ivoire, PHC-focused district, PHC, Nurse).</i>                                                                                                                                                                                                                                                                                                                                                                                                                                                                 |
|                                | <b>Referral</b>                  | <i>"Most of the parents that have gone through the procedure appreciate it, and now they are the ones telling another parent who cries when referred to the government hospital that 'look at my baby now he is very healthy, and you are not going to be admitted at the hospital, so please listen to (name of health worker), and the man that they will send you to will not delay you as it uses to be, and that man will do it faster for the children " (Sierra Leone, DH-focused district, PHC, Clinical Officer).<br/>"But we as health professionals at some point we are obligated to insist but not in a rude way. Make them understand that we are referring because we lack some resources and that there because it is a bigger hospital, they will get better". (Mozambique, DH focused district, PHC, Nurse).</i> |
| <b>Perceived-effectiveness</b> | <b>Screening</b>                 | <i>"I'm telling the truth, it's true that at our level we couldn't imagine that little children could have tuberculosis. To think that a child with a cough could have TB... With the project, we knew that even children could suffer from it, so when (during screening) we met a child who met the criteria, it required a referral for a probable search for TB" (Cameroon, DH-focused district, PHC, Nurse)</i>                                                                                                                                                                                                                                                                                                                                                                                                               |
|                                | <b>Nasopharyngeal aspiration</b> | <i>"It was difficult to diagnose, for example, the children who could not manage to give sputum, it (nasopharyngeal aspiration) helped a lot. I may not be able to explain it in my own words, but overall it is helping, it is improving, it is making the health center grow." (Mozambique, PHC-focused district, PHC, General medical technician)<br/>"Yes, it (nasopharyngeal aspiration) contributes to identify tuberculosis in children, it does help a lot. Because we aspirate the sample from a child and test for tuberculosis. If the child is positive then we can provide the treatment." (Cambodia, PHC focused district, PHC, Midwife)</i>                                                                                                                                                                         |
|                                | <b>Chest X-Ray</b>               | <i>So chest X-Ray has reduced the mortality rate first of all, improved the health of these children and improved the perception among mothers, that tuberculosis is there and it can be with their children regardless of the parent being with tuberculosis (or not). Because they don't know the</i>                                                                                                                                                                                                                                                                                                                                                                                                                                                                                                                            |

|                               |                                  |                                                                                                                                                                                                                                                                                                                                                                                                                                                                                                                                                                                                                                                                                                                                                                                                                                     |
|-------------------------------|----------------------------------|-------------------------------------------------------------------------------------------------------------------------------------------------------------------------------------------------------------------------------------------------------------------------------------------------------------------------------------------------------------------------------------------------------------------------------------------------------------------------------------------------------------------------------------------------------------------------------------------------------------------------------------------------------------------------------------------------------------------------------------------------------------------------------------------------------------------------------------|
|                               |                                  | <p>contacts where they got it from but you find them when they are positive, they get treatment and they become fine." (Uganda, DH, Nurse).</p> <p>"Yes, the X-ray helped because there were some children who could not find the germ in the stool or in the nasopharyngeal aspiration but it was the X-ray that showed their positivity." (Cameroon, DH, Nurse)</p>                                                                                                                                                                                                                                                                                                                                                                                                                                                               |
| <b>Burden</b>                 | <b>Nasopharyngeal aspiration</b> | "For NPA, I've already done it once and I can say that it's an unpleasant thing, honestly. It's unpleasant to have to hold a child, send the tubes through the nostrils and do it in front of the mother (...) I just felt pity for the child but I had to do the exam, I had to remain professional and it was also for his sake." (Cameroon, PHC-focused district, PHC, Nurse)                                                                                                                                                                                                                                                                                                                                                                                                                                                    |
|                               | <b>Referral</b>                  | <p>"When we have to refer them to the general hospital. Some parents, when you explain to them, well they say (...) my husband is not here so they can't go." (Côte d'Ivoire, DH-focused district, PHC, Nursing assistant)</p> <p>"There are (some) who are referred but are not able to reach the central health facility. Because they do not have the amount (of money) to be able to catch public transport. There are health units that are really very far from the central health facility. The inhabitants here are people who are very disadvantaged." (Mozambique, DH, Nurse).</p>                                                                                                                                                                                                                                        |
| <b>Self-efficacy</b>          | <b>Xpert MTB-RIF Ultra</b>       | "I never do it as I am afraid of breaking the machine (GI Edge). They told me to see and follow the steps but I am still afraid to spoiling the machine. I don't dare to do it." (Cambodia, PHC-focused district, PHC, Midwife)                                                                                                                                                                                                                                                                                                                                                                                                                                                                                                                                                                                                     |
|                               | <b>Chest X-Ray</b>               | "So, there's training that we've received and with the clinical mentorship we've really been able to improve, because I myself feel that, I'm a little more comfortable reading a pediatric X-ray now than I was a while ago." (Cameroon, DH, General Practitioner).                                                                                                                                                                                                                                                                                                                                                                                                                                                                                                                                                                |
|                               | <b>Clinical evaluation</b>       | "I feel more confident. I give it much time. After the training, I got more knowledge to go much deeper while evaluating presumptive children to find out whether the child is having TB or not." (Uganda, DH-focused district, PHC, clinical officer)                                                                                                                                                                                                                                                                                                                                                                                                                                                                                                                                                                              |
| <b>Ethicality</b>             | <b>Nasopharyngeal aspiration</b> | <p>"It (nasopharyngeal aspiration) is less invasive, (compared to) the gastric aspirate that we used to get before. Because personally I used to use the gastric to collect samples for tuberculosis detection in children." (Uganda, DH, General Practitioner).</p> <p>"Apart from the fact that sometimes after taking a sample from the first nostril, the child starts to manifest or he feels uncomfortable, and at times we have to stop. These are the only difficulties we have encountered." (Cameroon, PHC-focused district, PHC, Nurse)</p> <p>"So far no. Nobody has refused. (...) now it is a study, but in the ward, it wouldn't be a bad thing if there was another nurse who could learn how to do it. Because people see it as a very particular technique that is very special". (Mozambique, DH, Clinician)</p> |
| <b>Intervention coherence</b> | <b>Nasopharyngeal aspiration</b> | "So, you have to convince the parent first before doing the nasopharyngeal aspiration, and also always measure the saturation before, the parameters, it's important to do it before the aspiration. Because if you do a sample and then there are problems and they ask you what                                                                                                                                                                                                                                                                                                                                                                                                                                                                                                                                                   |

|                         |                    |                                                                                                                                                                                                                                                                                                                                                                 |
|-------------------------|--------------------|-----------------------------------------------------------------------------------------------------------------------------------------------------------------------------------------------------------------------------------------------------------------------------------------------------------------------------------------------------------------|
|                         |                    | <i>the patient's parameters were and you can't give them, it means that you yourself have contributed to this child going down." (Cameroon, DH, Nurse)</i>                                                                                                                                                                                                      |
|                         | <b>Chest X-Ray</b> | <i>"Because now even if someone is having a negative result, and we look at the x-ray, we can still know that this is tuberculosis or not. Especially those whom we give antibiotics and they still fail and they come we repeat a chest X-ray and we find some opacities in the lungs then we treat them clinically for tuberculosis." (Uganda, DH, Nurse)</i> |
| <b>Opportunity cost</b> | <b>Screening</b>   | <i>"The children who have fallen under the process I still follow them up to the village. I ride to their homes, I inspect the children then if I see it is required for that very person, that child to be brought back." (Uganda, DH-focused district, PHC, Screener).</i>                                                                                    |

Table 4. Facilitators and barriers to the acceptability of decentralizing a comprehensive childhood tuberculosis diagnosis package (2017-2022).

|                                     | <b>Facilitators</b>                                                                                                                                                                                                                                                                                                                                                                              | <b>Barriers</b>                                                                                                                                                                                                                                                                                                                                                                |
|-------------------------------------|--------------------------------------------------------------------------------------------------------------------------------------------------------------------------------------------------------------------------------------------------------------------------------------------------------------------------------------------------------------------------------------------------|--------------------------------------------------------------------------------------------------------------------------------------------------------------------------------------------------------------------------------------------------------------------------------------------------------------------------------------------------------------------------------|
| <b>Individual-level</b>             | <ul style="list-style-type: none"> <li>- Being pro-active in detecting tuberculosis</li> <li>- Bringing services closer to people in need</li> <li>- Self-efficacy in diagnosing tuberculosis</li> <li>- Trusting the quality of the tests &amp; procedures</li> <li>- Observing tangible results, positive tests, effectiveness</li> <li>- Feeling proud to provide quality services</li> </ul> | <ul style="list-style-type: none"> <li>- Causing discomfort to children during the nasopharyngeal aspiration procedure</li> <li>- Lack of exposure and confidence</li> </ul>                                                                                                                                                                                                   |
| <b>Facility/health system-level</b> | <ul style="list-style-type: none"> <li>- On the job training, support supervision, clinical mentoring</li> <li>- Functioning sample transportation channels in some countries</li> </ul>                                                                                                                                                                                                         | <ul style="list-style-type: none"> <li>- Lack of trained staff</li> <li>- Lack of space</li> <li>- Burden of documentation</li> </ul>                                                                                                                                                                                                                                          |
| <b>Structural-level</b>             | <ul style="list-style-type: none"> <li>- <i>No structural-level facilitators reported by HCWs interviewed</i></li> </ul>                                                                                                                                                                                                                                                                         | <ul style="list-style-type: none"> <li>- Lack of awareness within the community</li> <li>- Care behaviors (minor or grand-parents accompanying child)</li> <li>- Cultural practices</li> <li>- Transport and distance challenges</li> <li>- Power cuts</li> <li>- COVID-19-related disruption or interruption of services</li> <li>- Stigma related to tuberculosis</li> </ul> |
